# Supplementary material
Source: Springer Nature journal article supplement (https://www.springermedizin.de/resource/supplementary/12968_2011_2569_MOESM3_ESM.pdf/9582254)

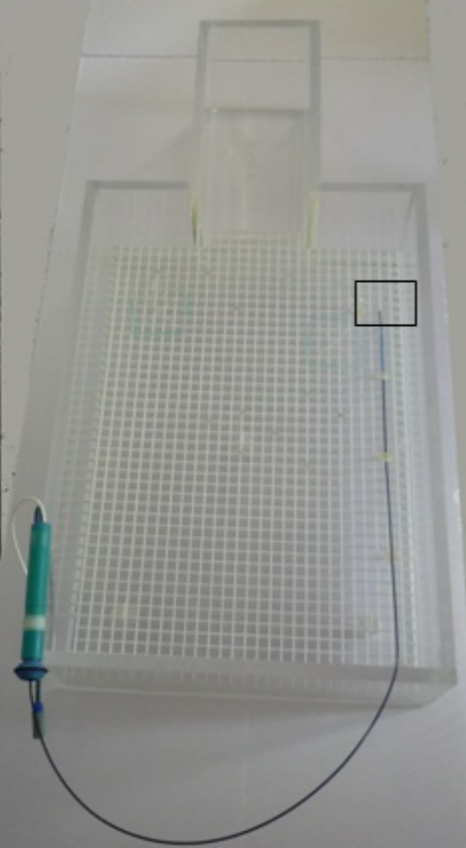

Supplement: MOESM3 [file 9582254]
